# Supplementary material for: pH Auto-Sustain-Based Fermentation Supports Efficient Gamma-Aminobutyric Acid Production by Lactobacillus brevis CD0817
Source: MDPI journal article supplement (doi:10.3390/fermentation8050208), 2022-05-03
Supplement: s1 [file s1]

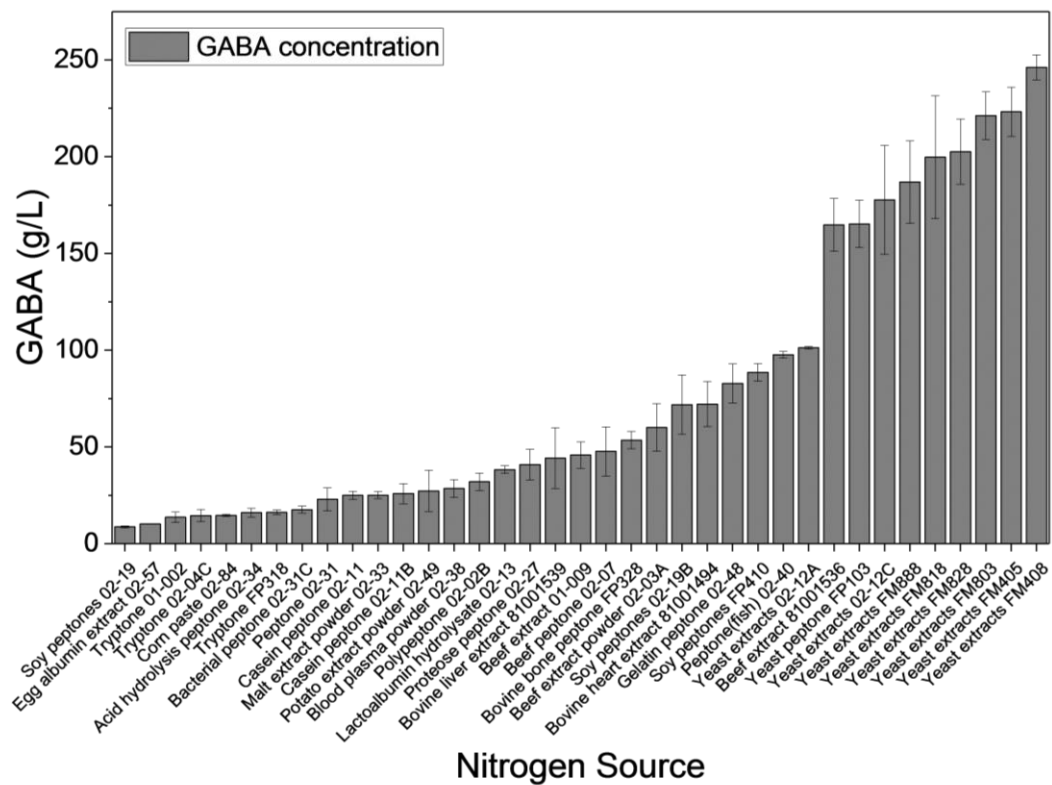

**Figure S1.** The effect of nitrogen sources on GABA production. The effect of nitrogen sources was evaluated using 250-mL Erlenmeyer fermentation flask under 32.0 °C for 96 h. Each nitrogen source was tested at level of 25 g/L. Vertical bars represent standard deviations of means ( $n = 3$ ). There were no significant differences in GABA concentrations generation by yeast extract FM408 and yeast extract FM405 ( $p = 0.842$ ) or yeast extract FM803 ( $p = 0.701$ ); however, there was significant difference between yeast extract FM408 and yeast extract FM828 ( $p = 0.005$ ), or yeast extract FM818 ( $p = 0.001$ ), or any other nitrogen source ( $p = 0.000$ ). GABA, gamma-aminobutyric acid.
